# Supplementary material for: Management Options for Fetal Bronchopulmonary Sequestration
Source: MDPI journal article supplement (doi:10.3390/jcm11061724), 2022-03-20
Supplement: s1 [file s1]

**Table S1.** Data of fetuses with BPS managed expectantly.

| Author                              | n   | GA at diagnosis                      | Hydrops           | Fetal / Neonatal death | Survival        | GA at birth | Surgery             |
|-------------------------------------|-----|--------------------------------------|-------------------|------------------------|-----------------|-------------|---------------------|
| Langer <i>et al.</i> , 1995 [32]    | 2   | 25 - 26                              | -                 | -                      | 2 (100%)        | 37 - 38     | 0/lost to follow-up |
| Abuhamad <i>et al.</i> , 1996 [33]  | 2   | 18                                   | -                 | -                      | 2 (100%)        | 39 – 40     | 0                   |
| da Silva <i>et al.</i> , 1996 [34]  | 3   | 25 - 34                              | + (2) ascites (1) | -                      | 3 (100%)        | 30 - 35     | 3 (100%)            |
| Evans <i>et al.</i> , 1996 [35]     | 3   | 25 - 34                              | + (3)             | -                      | 3 (100%)        | 30 - 36     | 3 (100%)            |
| Adzick <i>et al.</i> , 1998 [1]     | 37  | 18 - 36                              | + (1) ascites (1) | 1 (neonatal)           | 36              | no data     | 7 (19%)             |
| Becmeur <i>et al.</i> , 1998 [10]   | 8   | 20 - 33                              | -                 | -                      | 8 (100%)        | 37 - 40     | 8 (100%)            |
| Bratu <i>et al.</i> , 2001 [36]     | 13  | 24                                   | + (2)             | 2 (neonatal)           | 11 (84%)        | no data     | 11 (85%)            |
| Chen <i>et al.</i> , 2003 [37-39]   | 2   | 19 - 20                              | -                 | -                      | 2 (100%)        | 38 - 40     | 1 (50%)             |
| Illanes <i>et al.</i> , 2005 [440]  | 4   | 19 - 29                              | -                 | -                      | 4 (100%)        | no data     | 2 (50%)             |
| Ruano <i>et al.</i> , 2005 [41]     | 3   | 21 - 33                              | -                 | 1 (neonatal)           | 2 (77%)         | no data     | 3 (100%)            |
| Cavoretto <i>et al.</i> , 2008 [22] | 6   | 19 - 35                              | -                 | -                      | 6 (100%)        | 37 - 42     | 5 (83%)             |
| Mallmann <i>et al.</i> , 2014 [17]  | 29  | 20 - 27                              | -                 | -                      | 29 (100%)       | 34 - 39     | 16 (55%)            |
| Stoiber <i>et al.</i> , 2015 [18]   | 7   | 22                                   | -                 |                        | 7 (100%)        | 39          | no data             |
| Nunes <i>et al.</i> , 2015 [42]     | 7   | [2 <sup>nd</sup> – 3 <sup>rd</sup> ] |                   |                        | 7 (100%)        | >35         | 4 (57%)             |
| Pinto <i>et al.</i> , 2016 [43]     | 2   | 20 - 22                              | -                 |                        | 2 (100%)        | 34 - 38     | 0                   |
| Riley <i>et al.</i> , 2018 [19]     | 100 | 19 - 37                              | 5                 |                        | 100 (100%)      | 28 - 41     | 76 (76%)            |
| Present series                      | 16  | 20 - 28                              | -                 |                        | 16 (100%)       | 37 – 40     | 4 (25%)             |
| Total                               | 244 |                                      | 15/244 [6.1%]     | 4/244 [1.6%]           | 240/244 [98.3%] |             | 143/226 [63.3%]     |

n=number of fetuses included in the study; GA = gestational age in weeks; Surgery = number of fetuses requiring postnatal surgery

**Table S2a.** Invasive management: data of fetuses with BPS treated with thoraco-amniotic shunt.

| Author                                      | n | GA at interv. | Method of treatment                      | Presence of hydrothorax /hydrops | Effect               | Fetal death | Neonatal death | Survival  | GA at birth | Surgey   |
|---------------------------------------------|---|---------------|------------------------------------------|----------------------------------|----------------------|-------------|----------------|-----------|-------------|----------|
| Weiner <i>et al.</i> , 1986 [7]             | 1 | 24            | Thoracocentesis + Thoraco-amniotic shunt | 1 (100%)                         | Reaccumulated (100%) |             | 1              | 0         | 29          | 1 (100%) |
| Slotnick <i>et al.</i> , 1990 [8]           | 1 | 32            | Thoracocentesis + Thoraco-amniotic shunt | 1 (100%)                         | Resolved (100%)      |             |                | 1 (100%)  | 34          | 1 (100%) |
| Hernanz-Schultzman <i>et al.</i> , 1991 [2] | 1 | 27            | Thoraco-amniotic shunt                   | 1 (100%)                         | Resolved (100%)      |             |                | 1 (100%)  | 36          | 1 (100%) |
| Favre <i>et al.</i> , 1994 [9]              | 1 | 30            | Thoraco-amniotic shunt                   | 1 (100%)                         | Resolved (100%)      |             |                | 1 (100%)  | 38          | 1 (100%) |
| Adzick <i>et al.</i> , 1998 [1]             | 2 | 29-30         | Thoraco-amniotic shunt                   | 2 (100%)                         | Resolved (100%)      |             |                | 2 (100%)  | 33 - 35     | 2 (100%) |
| Becmeur <i>et al.</i> , 1998 [10]           | 1 | 30            | Thoraco-amniotic shunt                   | 1 (100%)                         | Resolved (100%)      |             |                | 1 (100%)  | 38          | 1 (100%) |
| Lopoo <i>et al.</i> , 1999 [11]             | 2 | 23-30         | Thoraco-amniotic shunt                   | 2 (100%)                         | Resolved (100%)      |             |                | 2 (100%)  | 33          | No data  |
| Salomon <i>et al.</i> , 2003 [12]           | 1 | 34            | Thoraco-amniotic shunt                   | 1 (100%)                         | Resolved (100%)      |             |                | 1 (100%)  | 36          | 0        |
| Picone <i>et al.</i> , 2004 [13]            | 1 | 19-36         | Thoraco-amniotic shunt                   | 1 (100%)                         | No data (100%)       |             |                | 1 (100%)  | 28-40       | No data  |
| Hayashi <i>et al.</i> , 2006 [14]           | 3 | 28-30         | Thoracocentesis + Thoraco-amniotic shunt | 3 (100%)                         | Resolved (100%)      |             |                | 3 (100%)  | 33-35       | 3 (100%) |
| Odaka <i>et al.</i> , 2006 [15]             | 1 | 27            | Thoraco-amniotic shunt                   | 1 (100%)                         | Reaccumulated (100%) |             |                | 1 (100%)  | 37          | 1 (100%) |
| Kitano <i>et al.</i> , 2006 [16]            | 3 | 27-30         | Thoracocentesis + Thoraco-amniotic shunt | 3 (100%)                         | Resolved (100%)      |             |                | 3 (100%)  | 33-35       | No data  |
| Mallmann <i>et al.</i> , 2014 [17]          | 7 | 25 - 29       | Thoraco-amniotic shunt                   | 7 (100%)                         | -                    | 1           |                | 6 (85.7%) | 30-37       | 5 (83%)  |
| Stoiber <i>et al.</i> , 2015 [18]           | 2 | 29-30         | Thoracocentesis + Thoraco-amniotic shunt | 2 (100%)                         | Resolved (100%)      |             | 1              | 1 (50%)   | 33-36       | 0        |

|                         |    |       |                        |              |                 |  |  |               |       |             |
|-------------------------|----|-------|------------------------|--------------|-----------------|--|--|---------------|-------|-------------|
| Riley et al., 2018 [19] | 2  | 23-27 | Thoraco-amniotic shunt | 2 (100%)     | Resolved (100%) |  |  | 2 (100%)      | 33-35 | 1 (50%)     |
| Present series          | 5  | 20-25 | Thoraco-amniotic shunt | 5 (100%)     | Resolved (100%) |  |  | 5 (100%)      | 34-38 | 3 (60%)     |
|                         | 34 |       |                        | 34/34 [100%] |                 |  |  | 31/34 [91.2%] |       | 21/26 [84%] |

n = number of fetuses included in the study; GA = gestational age in weeks; LB=life birth; IUD=intrauterine death; NND= neonatal death; Surgery = number of fetuses requiring postnatal surgery

**Table S2b.** Invasive management: data of fetuses with BPS treated with laser coagulation of the feeding vessel.

| Author                                    | No of fetuses | GA at interv. | Method of treatment | Presence of hydrothorax/hydrops | Effect                                | Fetal death | Neonatal death | Survival  | GA at birth | Surgery  |
|-------------------------------------------|---------------|---------------|---------------------|---------------------------------|---------------------------------------|-------------|----------------|-----------|-------------|----------|
| Oepkes et al., (2007) [20]                | 1             | 23            | Laser coagulation   | 1 (100%)                        | Resolved (100%)                       |             |                | 1 (100%)  | 39          | 0        |
| Ruano et al., 2007 [21]                   | 1             | 29            | Laser coagulation   | 1 (100%)                        | Resolved (100%)                       |             |                | 1 (100%)  | 38          | 1 (100%) |
| Cavoretto et al., 2008 [22]               | 8             | 23-32         | Laser coagulation   | 8 (100%)                        | Resolved (100%)                       |             |                | 8 (100%)  | 34-41       | 5 (63%)  |
| Witlox et al., (2009) [23]                | 1             | 23            | Laser coagulation   | 1 (100%)                        | Resolved (100%)                       |             |                | 1 (100%)  | 41          | 0        |
| Ruano et al., 2012 [24]                   | 3             | 24-29         | Laser coagulation   | 3 (100%)                        | Resolved (66.7%)<br>No change (33.3%) | 1           |                | 2 (66.7%) | 30-39       | No data  |
| Mallmann et al., 2014 [17]                | 5             | 24 - 31       | Laser coagulation   | 5 (100%)                        | Resolved (100%)                       |             |                | 5 (100%)  | 38 - 40     | 1 (20%)  |
| Cruz-Martinez et al., 2015, 2017 [25, 26] | 15            | 20-31         | Laser coagulation   | 15 (100%)                       | Resolved (100%)                       |             |                | 15 (100%) | 35-40       | 0        |
| Kosinski et al., 2017 [27]                | 2             | 22-27         | Laser coagulation   | 2 (100%)                        | Resolved (100%)                       |             |                | 2 (100%)  | 39-41       | 0        |
| Gottschalk et al., 2017 [28]              | 11            | 25-34         | Laser coagulation   | 11 (100%)                       | Resolved (100%)                       |             |                | 11 (100%) | 30-42       | 3 (27%)  |

|                |    |       |                   |          |                 |  |  |               |       |               |
|----------------|----|-------|-------------------|----------|-----------------|--|--|---------------|-------|---------------|
| Present series | 7  | 21-25 | Laser coagulation | 7 (100%) | Resolved (100%) |  |  | 7 (100%)      | 39-41 | 2 (28.6%)     |
| Total          | 54 |       |                   |          |                 |  |  | 53/54 [98.1%] |       | 12/51 [23.5%] |

N = number of fetuses included in the study; GA = gestational age in weeks; LB=life birth; IUD=intrauterine death; Surgery = number of fetuses requiring postnatal surgery

**Table S2c.** Invasive management: data of fetuses with BPS treated with intratumor injection of sclerosant or combined treatment.

| Author                       | No of fetuses | GA at interv. | Method of treatment                                         | Presence of hydrothorax /hydrops | Effect          | Fetal death | Neonatal death | Survival    | GA at birth | Surgery     |
|------------------------------|---------------|---------------|-------------------------------------------------------------|----------------------------------|-----------------|-------------|----------------|-------------|-------------|-------------|
| Nicolini et al. 2000 [29]    | 1             | 27            | Alcohol injection + thoracoamniotic shunt                   | 1 (100%)                         | Resolved (100%) |             |                | 1 (100%)    | 40          | 0           |
| Bermudez et al., 2007 [30]   | 3             | 24-26         | Polidocanol injection                                       | 2 (67%)                          | Resolved (100%) |             | 1              | 2 (67%)     | 38          | 2 (67%)     |
| Ramos KS et al., 2010 [31]   | 2             | 30-31         | Thoracoamniotic shunt + laser coagulation + thoracocentesis | 1 (100%)                         | Resolved (100%) |             |                | 2 (100%)    | No data     | 2 (100%)    |
| Gottschalk et al., 2017 [28] | 1             | 25, 26        | Thoracoamniotic shunt + laser coagulation                   | 1 (100%)                         | Resolved (100%) |             |                | 1 (100%)    | 40          | 0           |
| Present series               | 1             | 25            | Thoracoamniotic shunt + laser coagulation                   | 1 (100%)                         | Resolved (100%) |             |                | 1 (100%)    | 40          | 1 (100%)    |
| Total                        | 8             |               |                                                             |                                  |                 |             |                | 7/8 [87.5%] |             | 5/8 [62.5%] |

N = number of fetuses included in the study; GA = gestational age in weeks; LB=life birth; NND= neonatal death; Surgery = number of fetuses requiring postnatal surgery
